# Supplementary material
Source: publisher figshare collection journal article supplement (https://gsajournals.figshare.com/ndownloader/files/23153597)
Supplement: Supplementary file 1 [file 23153597]

| **Table S1: Strains used in this study** | | | |
| --- | --- | --- | --- |
| **Genotype** | **Strain #** | **Additional information** | **Reference** |
| *∆hH2Az::hph* | S532 | progeny from cross of NCU05347(FGSC12088) x S520 (*mat-;∆dim-5::nat1;Bml::tk+)* | This study |
| *∆hH2Az::hph* | ACx11-12 | progeny from cross of NCU05347(FGSC12088) x S520 (*mat-;∆dim-5::nat1;Bml::tk+)* | This study |
| *∆hH2Az::hph* | ACx11-14 | progeny from cross of NCU05347(FGSC12088) x S520 (*mat-;∆dim-5::nat1;Bml::tk+)* | This study |
| *∆hH2Az::hph* | ACx11-17 | progeny from cross of NCU05347(FGSC12088) x S520 (*mat-;∆dim-5::nat1;Bml::tk+)* | This study |
| Wild type | ACx11-2 | progeny from cross of NCU05347(FGSC12088) x S520 (*mat-;∆dim-5::nat1;Bml::tk+)* | This study |
| Wild type | ACx11-3 | progeny from cross of NCU05347(FGSC12088) x S520 (*mat-;∆dim-5::nat1;Bml::tk+)* | This study |
| *∆hH2Az::hph;hH2Az+* | ACt9-3 | primary transformant *hH2Az* complementation | This study |
| *∆hH2Az::hph;hH2Az+* | ACt12-1 | primary transformant *hH2Az* complementation | This study |
| Wild type | S2 | FGSC2489 | (1) |
| Wild type | S1 | FGSC4200 | (1) |
| *∆hH2Az::hph;∆set-7::hph* | ACx36-1 | progeny from cross of NCU05347 (FGSC12088) x S238 (FGSC11182) | This study |
| *∆set-7::hph* | S238 | NCU07496 (FGSC11182) | (1) |
| *h2a.z-GFP-hph;mcm-2-RFP-hph* | S493 | progeny from cross of *hH2Az-GFP-hph;mcm-2-RFP-hph* (SH732) and *∆dim-5::bar;∆set-7::hph* (S353). This progeny is EBx259-25 | This study |
| *h2a.z-GFP-hph;mcm-2-RFP-hph;∆set-7::hph* | S496 | progeny from cross of *hH2Az-GFP-hph;mcm-2-RFP-hph* (SH732) and *∆dim-5::bar;∆set-7::hph* (S353). This progeny is EBx259-26 | This study |
| *h2a.z-GFP-hph;mcm-2-RFP-hph; ∆set7::hph;∆dim5::bar* | S499 | progeny from cross of *hH2Az-GFP-hph;mcm-2-RFP-hph* (SH732) and *∆dim-5::bar;∆set-7::hph* (S353). This progeny is EBx259-27 | This study |
| *h2a.z-GFP-hph;mcm-2-RFP-hph;∆dim5::bar* | S501 | progeny from cross of *hH2Az-GFP-hph;mcm-2-RFP-hph* (SH732) and *∆dim-5::bar;∆set-7::hph* (S353). This progeny is EBx259-28 | This study |
| *∆swr-1::hph* | NCU09993 | NCU09993 (FGSC11398) | (1) |
| *∆dim-5::bar;∆set-7::hph* | S355 | progeny from cross of set-7 (FGSC11182) x dim-5 (S132) cross | (2) |
| *his-3-;∆mus-52::bar (A)* | S7 |  |  |
| *∆eed::hph* | S375 | NCU05300 (FGSC14852) | (1) |
| *∆eed::hph;his3::Pccg-1-3xflag-eed* | S607 |  | This study |
| *∆hH2Az;∆eed::hph; his3::Pccg-1-3xflag-eed* | ACx71-2 |  | This study |
| *∆cac-3* | NCU06679 | NCU06679 (FGSC13916) | (1) |

1. Colot, H. V., G. Park, G. E. Turner, C. Ringelberg, C. M. Crew *et al.*, 2006 A high throughput gene knockout procedure for Neurospora reveals functions for multiple transcription factors. Proc Natl Acad Sci U S A 103**:** 10352-10357.
2. Basenko, E. Y., T. Sasaki, L. X. Ji, C. J. Prybol, R. M. Burckhardt *et al.*, 2015 Genome-wide redistribution of H3K27me3 is linked to genotoxic stress and defective growth. Proceedings of the National Academy of Sciences of the United States of America 112**:** E6339-E6348.
